# Supplementary material
Source: PubMed Central journal article supplement (PMC5951268)
Supplement: NIHMS75858-supplement-Supplementary_Information_Guide.pdf [file NIHMS75858-supplement-Supplementary_Information_Guide.pdf]

# **The SMAD2/3 interactome reveals that TGF $\beta$ controls m<sup>6</sup>A mRNA methylation in pluripotency**

Bertero A. et al.,

## **Supplementary Information Guide**

**Supplementary Information (pdf):** Supplementary Discussion and Supplementary Information specific references.

**Supplementary Figure 1:** Uncropped Western blot scans with size marker indications.

**Supplementary Table 1:** SMAD2/3 interacting proteins in hESCs and endoderm cells.

**Supplementary Table 2:** m6A peaks in exons, introns, and spanning exon-intron junctions.

**Supplementary Table 3:** Gene ontology enrichment analysis for transcripts where m6A is downregulated after inhibition of Activin/Nodal signalling.

**Supplementary Table 4:** Genes differentially expressed during exit from pluripotency in WTAP inducible knockdown hESCs.

**Supplementary Table 5:** Oligonucleotides used in the study.

**Supplementary Table 6:** Antibodies used in the study.

**Source Data Tables Figure 2-3 and Extended Data Figure 1-10:** Raw data used for graphical representations in the matching Figure or Extended Data Figure.
